# Supplementary material for: Importance measures for customer requirements and technical attributes in fuzzy environment
Source: Springer Nature journal article supplement (doi:10.1186/s13041-021-00863-x), 2006-05-24

a

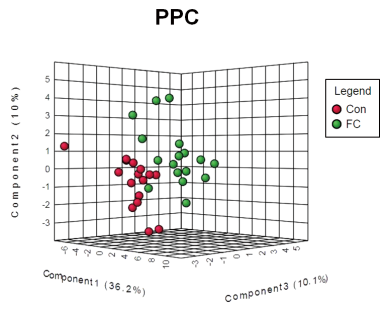

b

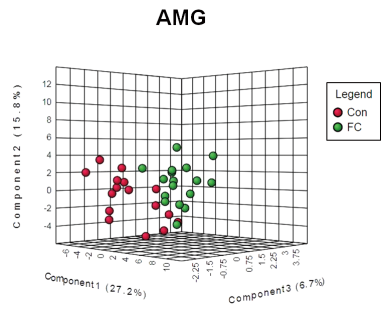

c

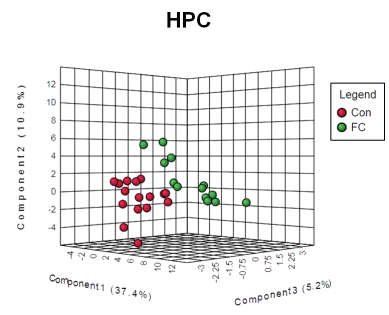

Supplement: MOESM1 [file 25664512]
